# Supplementary material for: The Interference of Age and Gender on Smile Characterization Analyzed on Six Parameters: A Clinical-Photographic Pilot Study
Source: MDPI journal article supplement (doi:10.3390/medicina59030595), 2023-03-17
Supplement: s1 [file medicina-2280480-supplementary.pdf › medicina-2280480-supplementary.pdf]

|                         |  |                |                |
|-------------------------|--|----------------|----------------|
|                         |  | Pupillary line | Pupillary line |
| Upper third (Trichion)  |  |                |                |
| Middle third (Glabella) |  |                |                |
| Middle third (Subnasal) |  |                |                |
| Bottom third (Menton)   |  |                |                |

**Figure S1.** Background template for guidance and reference of the anatomical parameters.
